# Supplementary material
Source: PubMed Central journal article supplement (PMC3911248)
Supplement: JB.00921-13_zjb999092977so1.pdf [file JB.00921-13_zjb999092977so1.pdf]

## 1 **Supplementary material**

2 Nicolaes et al.

3

4 **Plasmid constructions** – The YciM expression vectors were constructed as follows: the region  
5 encoding YciM was amplified from the chromosome of MC1000 strain using primers *yciM\_NcoI*  
6 and *yciM\_HindIII\_pBAD* and cloned into a pBAD-HisB plasmid (Invitrogen), yielding pVN2. A  
7 C-terminal His-tagged version of YciM was constructed by amplifying the *yciM* gene from the  
8 chromosome of MC1000 strain using primers *yciM\_NcoI* and *yciM\_BglIII\_pQE60* and cloned into  
9 a pQE60 plasmid (Qiagen), yielding pCB25. The sequence coding for *yciM* fused to that coding  
10 for the C-terminal His-tag was then cut with *NcoI* and *HindIII* from pCB25 and inserted into a  
11 pBAD-HisB vector, yielding plasmid pHE43. The sequence encoding a truncated form of YciM  
12 (YciM<sup>\*</sup>) lacking the first 22 amino acids was amplified and cloned into 2 different vectors:  
13 pBAD-HisB and pASK-IBA63a-plus. Two different versions of YciM<sup>\*</sup> were produced by each  
14 vector: YciM<sup>\*</sup> with a C-terminal tag or YciM<sup>\*</sup> without any tag. In order to introduce the  
15 sequence encoding the C-terminal His-tagged version of YciM<sup>\*</sup> into the pBAD-HisB vector, the  
16 coding sequence for the truncated form of YciM (YciM<sup>\*</sup>) was amplified with primers  
17 *yciM<sup>\*</sup>\_NcoI* and *yciM<sup>\*</sup>\_BglIII\_pBAD* using pHE43 as a template, cut with *NcoI* and *BglIII* and then  
18 inserted into pHE43, generating plasmid pHE72. The sequence encoding the untagged  
19 YciM<sup>\*</sup> version was cloned into the pBAD-HisB vector by amplifying *yciM<sup>\*</sup>* with primers  
20 *yciM<sup>\*</sup>\_NcoI* and *yciM<sup>\*</sup>\_HindIII\_pBAD* using pVN2 as a template. The PCR product was then cut  
21 with *NcoI* and *HindIII* and inserted into pVN2, generating plasmid pVN182. In order to clone  
22 *yciM<sup>\*</sup>* into the pASK-IBA63a-plus vector, *yciM<sup>\*</sup>* was amplified using pHE72 as a template with  
23 two different primers pairs: *yciM<sup>\*</sup>\_NcoI* and *yciM<sup>\*</sup>\_XhoI\_pASK* or *yciM<sup>\*</sup>\_NcoI* and

24 *yciM\_XhoI\_STOP*. The PCR products were then cut with *NcoI* and *XhoI* and inserted into a  
25 pASK-IBA63a-plus plasmid to generate pVN55 (coding for YciM\* with a C-terminal Strep-tag)  
26 and pVN74 (coding for untagged YciM\*), respectively.

27 Three mutant alleles expressing proteins YciM\*<sub>SS/CCCC-Strep</sub>, YciM\*<sub>SS/CCCC-His</sub> and  
28 YciM<sub>CC/SSSS</sub> were constructed by site-directed mutagenesis using the QuickChange Site-Directed  
29 Mutagenesis protocol (Stratagene) and plasmids pVN55, pHE72 and pVN2 as template,  
30 respectively. The expression plasmids for YciM\*<sub>SS/CCCC-Strep</sub> and YciM\*<sub>SS/CCCC-His</sub> were generated  
31 by sequentially replacing the codons for cysteines 184 and 256 by serine codons using the  
32 following mutagenic primers: *yciM\_C1S1\_Fw* and *yciM\_C1S1\_Rv* for cysteine C184,  
33 *yciM\_C2S2\_Fw* and *yciM\_C2S2\_Rv* for cysteine C256 (yielding plasmid pVN67 and pVN147,  
34 respectively). To produce the YciM<sub>CC/SSSS</sub> mutant protein, the codons for cysteines 357, 360, 371  
35 and 374 were replaced by serine codons using primers *yciM\_S1XXS2\_Fw* and *yciM\_S1XXS2\_Rv*  
36 for C357 and C360 and *yciM\_S3XXS4\_Fw* and *yciM\_S3XXS4\_Rv* for C371 and C374 (yielding  
37 plasmid pVN181).

38 The gene encoding mCherry was PCR-amplified with primers *mCherry\_Fw* and  
39 *mCherry\_Rv* from the plasmid pRSET-BmCherry and ligated in frame at the 3' end of the *yciM*  
40 gene, replacing the sequence coding for the His-tag of the pHE43 or pHE72 plasmids. The  
41 resulting plasmids, designated as pHE64 and pVN68, encode the fusion proteins YciM<sub>mCherry</sub> and  
42 YciM\*<sub>mCherry</sub>, respectively.

43 All plasmids were verified by sequencing.

44

45 **Table S1. Strains and plasmids used in this study**

| Strains<br>or plasmids | Relevant genotype or features                                                                                                                          | Source or Ref. |
|------------------------|--------------------------------------------------------------------------------------------------------------------------------------------------------|----------------|
| <b>Strains</b>         |                                                                                                                                                        |                |
| MC1000                 | F <sup>-</sup> $\lambda^+$ <i>araD139</i> $\Delta$ ( <i>ara-leu</i> )7697 $\Delta$ ( <i>lacIY</i> )74<br><i>galU galK rpsL</i>                         | (1)            |
| BL21                   | F <sup>-</sup> <i>dcm ompT hsdS</i> (r <sub>B</sub> -m <sub>B</sub> -) <i>gal</i> $\lambda$ (DE3)                                                      | (2)            |
| XL1-Blue               | <i>recA1 endA1 gyrA96 thi</i> <sup>-1</sup> <i>hsdR17 supE44</i><br><i>relA1 lac</i> [F <i>proAB lacI qZ</i> $\Delta$ M15 <i>Tn10</i> ( <i>Tetr</i> )] | Stratagene     |
| BW25113                | <i>rrnB3</i> $\Delta$ <i>lacZ</i> 4787 <i>hsdR514</i> $\Delta$ ( <i>araBAD</i> )567<br>$\Delta$ ( <i>rhaBAD</i> )568 <i>rph-1</i>                      | (3)            |
| CB23                   | MC1000 $\Delta$ <i>yciM</i> :: <i>kan</i>                                                                                                              | This study     |
| JW1272                 | BW25113 $\Delta$ <i>yciM</i> :: <i>kan</i>                                                                                                             | (4)            |
| JW2479                 | BW25113 $\Delta$ <i>yfgC</i> :: <i>kan</i>                                                                                                             | (4)            |
| JW3119                 | BW25113 $\Delta$ <i>yraP</i> :: <i>kan</i>                                                                                                             | (4)            |
| JW5105                 | BW25113 $\Delta$ <i>ybiX</i> :: <i>kan</i>                                                                                                             | (4)            |
| NR1681                 | MC1000 $\Delta$ <i>yciS</i> :: <i>kan</i>                                                                                                              | This study     |
| NR1647                 | MC1000 $\Delta$ <i>yciM</i>                                                                                                                            | This study     |
| HE43                   | BL21 carrying pHE43                                                                                                                                    | This study     |
| HE64                   | CB23 carrying pHE64                                                                                                                                    | This study     |
| HE89                   | CB23 carrying pHE89                                                                                                                                    | This study     |
| VN15                   | MC1000 <i>ara</i> <sup>R</sup>                                                                                                                         | This study     |
| VN20                   | VN15 carrying empty pBAD-HisB                                                                                                                          | This study     |
| VN26                   | MC1000 $\Delta$ <i>pyrF</i> :: <i>kan</i>                                                                                                              | This study     |
| VN50                   | VN15 $\Delta$ <i>yciM</i> :: <i>kan</i>                                                                                                                | This study     |
| VN57                   | BL21 carrying pVN55                                                                                                                                    | This study     |
| VN63                   | BL21 carrying pHE72                                                                                                                                    | This study     |
| VN64                   | NR1647 $\Delta$ <i>rfaI</i> :: <i>kan</i>                                                                                                              | This study     |
| VN69                   | BL21 carrying pVN67                                                                                                                                    | This study     |
| VN75                   | BL21 carrying pVN74                                                                                                                                    | This study     |
| VN90                   | NR1647 $\Delta$ <i>rfaQ</i> :: <i>kan</i>                                                                                                              | This study     |
| VN94                   | NR1647 $\Delta$ <i>asmA</i> :: <i>kan</i>                                                                                                              | This study     |
| VN110                  | NR1647 $\Delta$ <i>rfaP</i> :: <i>kan</i>                                                                                                              | This study     |
| VN148                  | BL21 carrying pVN147                                                                                                                                   | This study     |
| VN179                  | VN50 carrying empty pBAD-HisB                                                                                                                          | This study     |
| VN187                  | VN50 carrying pVN2                                                                                                                                     | This study     |
| VN196                  | VN50 carrying pVN182                                                                                                                                   | This study     |
| VN198                  | BL21 carrying pVN182                                                                                                                                   | This study     |
| VN213                  | VN50 carrying pVN173                                                                                                                                   | This study     |
| VN237                  | CB23 carrying pVN68                                                                                                                                    | This study     |
| VN241                  | BL21 carrying pVN2                                                                                                                                     | This study     |
| VN250                  | MC1000 $\Delta$ <i>envC</i> :: <i>kan</i>                                                                                                              | This study     |
| VN255                  | NR1647 $\Delta$ <i>prc</i> :: <i>kan</i>                                                                                                               | This study     |

|        |                                               |            |
|--------|-----------------------------------------------|------------|
| VN262  | NR1647 $\Delta mrcA::kan$                     | This study |
| VN264  | NR1647 $\Delta ponB::kan$                     | This study |
| VN266  | NR1647 $\Delta pbpc::kan$                     | This study |
| VN268  | NR1647 $\Delta nlpD::kan$                     | This study |
| VN343  | BL21 carrying pVN173                          | This study |
| NR2793 | MC1000 <i>zib563::Tn10</i>                    | This study |
| NR2794 | MC1000 <i>zib563::Tn10</i> $\Delta envC::kan$ | This study |
| NR2795 | NR1647 <i>zib563::Tn10</i>                    | This study |
| NR2796 | NR1647 <i>zib563::Tn10</i> $\Delta envC::kan$ | This study |

### Plasmids

|                  |                                                                                                                                                              |                                                          |
|------------------|--------------------------------------------------------------------------------------------------------------------------------------------------------------|----------------------------------------------------------|
| pBAD-HisB        | L-arabinose inducible expression vector, N-terminal His <sub>6</sub> -tag                                                                                    | Invitrogen                                               |
| pASK-IBA63a-plus | P <sub>Tet</sub> dependent expression vector, C-terminal Strep-tag                                                                                           | IBA                                                      |
| pRSET-B-mCherry  | P <sub>T7</sub> dependent expression vector, C-terminal mCherry protein                                                                                      | Received from Xavier De Bolle, University of Namur       |
| pQE60            | P <sub>T5</sub> dependent expression vector, C-terminal His <sub>6</sub> tag                                                                                 | Qiagen                                                   |
| pCB25            | pQE60 with YciM <sub>His</sub> , C-terminal His <sub>6</sub> -tag                                                                                            | This study                                               |
| pHE43            | pBAD-HisB with YciM <sub>His</sub> , C-terminal His <sub>6</sub> -tag                                                                                        | This study                                               |
| pHE72            | pBAD-HisB with YciM <sub>His</sub> <sup>*</sup> , truncated protein, C-terminal His <sub>6</sub> -tag                                                        | This study                                               |
| pHE64            | pBAD-HisB with YciM <sub>mCherry</sub> , C-terminal mCherry                                                                                                  | This study                                               |
| pHE89            | pFPV25 with <i>fruB</i> -GFP, constitutively active GFP in the cytoplasm                                                                                     | Received from A. Aersten, Katholieke Universiteit Leuven |
| pVN2             | pBAD-HisB with YciM, full-length protein                                                                                                                     | This study                                               |
| pVN55            | pASK-IBA63a-plus with YciM <sub>Strep</sub> <sup>*</sup> , truncated protein, C-terminal Strep-tag                                                           | This study                                               |
| pVN67            | pASK-IBA63a-plus with YciM <sub>SS/CCCC-Strep</sub> <sup>*</sup> , truncated protein, C <sub>184</sub> and C <sub>256</sub> mutated, C-terminal Strep-tag    | This study                                               |
| pVN68            | pBAD-HisB with YciM <sub>mCherry</sub> <sup>*</sup> , truncated protein, C-terminal mCherry                                                                  | This study                                               |
| pVN74            | pASK-IBA63a-plus with YciM <sup>*</sup> , truncated protein                                                                                                  | This study                                               |
| pVN147           | pBAD-HisB with YciM <sub>SS/CCCC-His</sub> <sup>*</sup> , truncated protein, C <sub>184</sub> and C <sub>256</sub> mutated, C-terminal His <sub>6</sub> -tag |                                                          |
| pVN173           | pBAD-HisB with YciM <sub>CC/SSSS</sub> , C <sub>357</sub> , C <sub>360</sub> , C <sub>371</sub> and C <sub>374</sub> mutated                                 | This study                                               |



47 **Table S2. Primers used in this study**

| Primer                       | Sequence (5'-3')                                          |
|------------------------------|-----------------------------------------------------------|
| <i>yciM_NcoI</i>             | TTACCATGGTGGAGTTGTTGTTTCTGCTTTTGCC                        |
| <i>yciM_BglII_pQE60</i>      | TTAAGATCTACAGGCCATCAAGACCGCGAATCGG                        |
| <i>yciM_HindIII_pBAD</i>     | TTAAAGCTTACAGGCCATCAAGACCGCGAATCGG                        |
| <i>yciM<sup>*</sup>_NcoI</i> | TTACCATGGCGCAACAAAACAAGCAAGATGAAGC                        |
| <i>yciM_BglII_pBAD</i>       | TTAAGATCTCAGGCCATCAAGACCGCG                               |
| <i>yciM_XhoI_pASK</i>        | AATTACTCGAGCAGGCCATCAAGACCGCGAATCGGTTAAT                  |
| <i>yciM_XhoI_STOP</i>        | TTACTCGAGTTACAGGCCATCAAGACCGCG                            |
| <i>yciM_C1S1_Fw</i>          | CGCGTCGAAATTGCCATTTCTAC <u>AGT</u> GAGTTAGCCCTGCAG        |
| <i>yciM_C1S1_Rv</i>          | CTGCAGGGCTAACTCACTGTAGAAATGGGCAATTTTCGACGCG               |
| <i>yciM_C2S2_Fw</i>          | ACGCTGGAAATGTTGCAAACC <u>AGCT</u> ATCAGCAGTTGGGTAAAAGTACC |
| <i>yciM_C2S2_Rv</i>          | GGCAGTTTTACCCAAGTCTGATAGCTGGTTTGCAACATTTCCAGCGT           |
| <i>yciM_S1XXS2_Fw</i>        | CTCGTTATCGTAGCCAGAAAAGTGGTTTTA                            |
| <i>yciM_S1XXS2_Rv</i>        | CGGTAAAACCACTTTTCTGGCTACGATAACGAG                         |
| <i>yciM_S3XXS4_Fw</i>        | CTACTGGCATAGTCCGCTAGTCCGGCCTGG                            |
| <i>yciM_S3XXS4_Rv</i>        | CCAGGCCCGACTAGACGGACTATGCCAGTAG                           |
| <i>mCherry_Fw</i>            | CACAGATCTGTGAGCAAGGGCGAG                                  |
| <i>mCherry_Rv</i>            | GTAAAGCTTACTTGTACAGCTCGTCC                                |

48 The underlined nucleotides correspond to serine codons replacing the cysteine codons

49

50

51

52

53

54

55

56

57

58

59

60 **Table S3. Mutants from the Keio collection sensitive to both rifampin and SDS-EDTA**

| Gene        | SDS-EDTA | Rifampin | Gene        | SDS-EDTA | Rifampin |
|-------------|----------|----------|-------------|----------|----------|
| <i>bamB</i> |          |          | <i>rfaP</i> |          |          |
| <i>bamE</i> |          |          | <i>rimM</i> |          |          |
| <i>cmk</i>  |          |          | <i>rplI</i> |          |          |
| <i>dedD</i> |          |          | <i>rpsF</i> |          |          |
| <i>dnaK</i> |          |          | <i>rseA</i> |          |          |
| <i>fabH</i> |          |          | <i>surA</i> |          |          |
| <i>fur</i>  |          |          | <i>tatB</i> |          |          |
| <i>galU</i> |          |          | <i>tatC</i> |          |          |
| <i>gmhB</i> |          |          | <i>tdK</i>  |          |          |
| <i>ipp</i>  |          |          | <i>thyA</i> |          |          |
| <i>lipA</i> |          |          | <i>tolB</i> |          |          |
| <i>lpcA</i> |          |          | <i>tolC</i> |          |          |
| <i>pal</i>  |          |          | <i>tolQ</i> |          |          |
| <i>rbfA</i> |          |          | <i>tolR</i> |          |          |
| <i>rfaC</i> |          |          | <i>ubiE</i> |          |          |
| <i>rfaD</i> |          |          | <i>ubiF</i> |          |          |
| <i>rfaE</i> |          |          | <i>ubiH</i> |          |          |
| <i>rfaF</i> |          |          | <i>ybiX</i> |          |          |
| <i>rfaG</i> |          |          | <i>yciM</i> |          |          |
| <i>rfaH</i> |          |          | <i>yfgC</i> |          |          |
| <i>rfaI</i> |          |          | <i>yraP</i> |          |          |

61  
 62 The sensitivity to hydrophobic antibiotics and detergent of the mutants from the Keio collection  
 63 was determined. The mutants were streaked on LB plates containing either rifampin (25 µg) or  
 64 SDS-EDTA (0.05 %, 1.25 mM). Only the mutants that are sensitive to both conditions are listed  
 65 in this table. Black: no growth, Grey: poor growth

66  
 67  
 68  
 69  
 70  
 71  
 72

73 **Table S4. Sensitivity of *yciM*, *yraP*, *ybiX* and *yfgC* strains to various hydrophobic antibiotics**  
 74  
 75

|             | <i>Inhibition zone (mm)</i> |                       |                         |
|-------------|-----------------------------|-----------------------|-------------------------|
|             | Rifampin<br>(25 µg)         | Bacitracin<br>(10 µg) | Erythromycin<br>(15 µg) |
| WT          | 12 ± 0,5                    | <6                    | <6                      |
| <i>yciM</i> | 21 ± 1                      | 11 ± 2.9              | 13 ± 3.8                |
| <i>yraP</i> | 17.3 ± 0.5                  | 13.7 ± 0.5            | 10.3 ± 1.3              |
| <i>ybiX</i> | 14.6 ± 0.5                  | <6                    | 10.3 ± 1.9              |
| <i>yfgC</i> | 19 ± 1.4                    | <6                    | 10.6 ± 0.9              |

76  
 77  
 78 The sensitivity of JW1272 ( $\Delta yciM::kan$ ), JW3119 ( $\Delta yraP::kan$ ), JW5104 ( $\Delta ybiX::kan$ ) and  
 79 JW2479 ( $\Delta yfgC::kan$ ) strains to four hydrophobic antibiotics was determined by measuring the  
 80 diameter of the inhibition zone using BBL Sensi-Discs Antimicrobial Susceptibility Test Discs  
 81 containing rifampin (25 µg), bacitracin (10 µg) or erythromycin (15 µg). Discs have a diameter of  
 82 6 mm. Strains JW1272, JW3119, JW5104 and JW2479 are from the Keio collection (4).

83  
 84  
 85  
 86  
 87  
 88  
 89  
 90  
 91  
 92



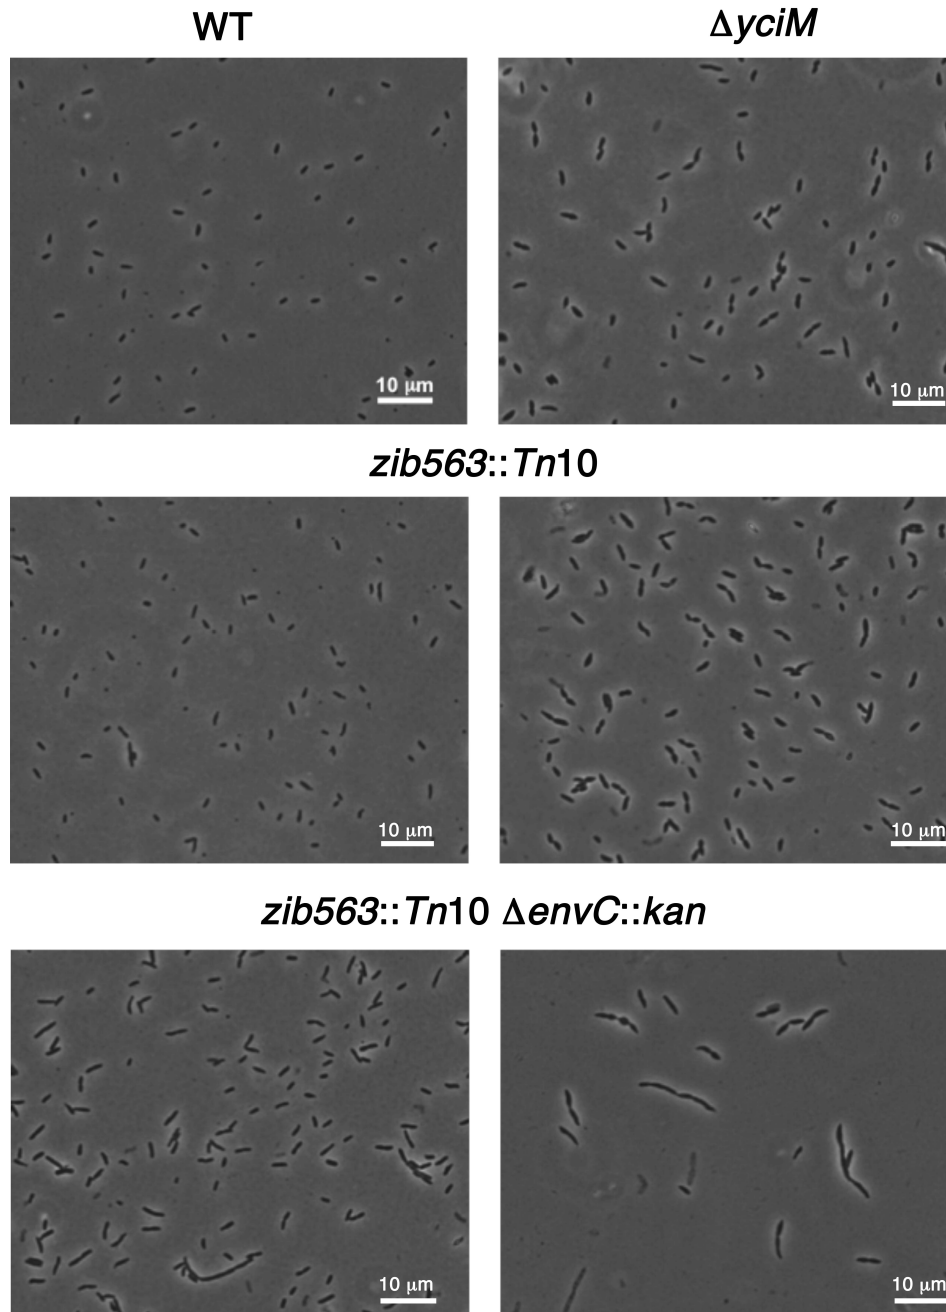

93

94 **Figure S1. *yciM envC* null alleles exhibit a synthetic phenotype.** Phase-contrast images of  
 95 *yciM* and *envC* single and double mutant strains grown overnight on LB agar at 37°C show that  
 96 cells lacking both YciM and EnvC exhibit severe morphological defects and increased lysis with  
 97 respect to wild-type and single-mutant strains. The *zib563::Tn10* allele was used to co-transduce  
 98 the  $\Delta envC::kan$  allele as described in Materials and Methods.

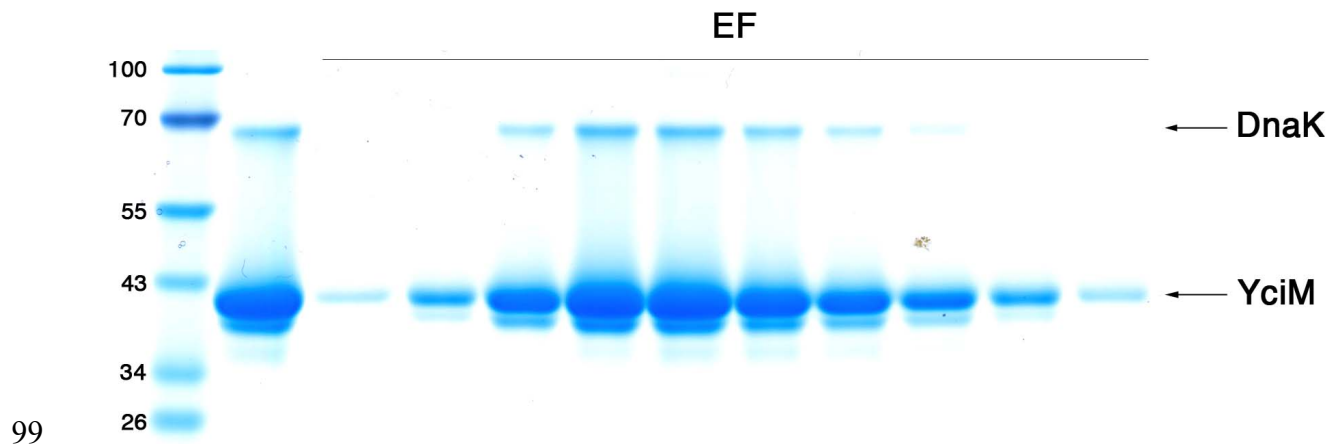

100 **Figure S2. YciM\* co-purifies with DnaK.** The truncated version of YciM was purified by three  
 101 steps of purification (affinity chromatography, anion exchange chromatography and gel  
 102 filtration). The fractions that eluted from a Superdex S200 gel filtration column (EF) were loaded  
 103 onto a SDS-PAGE and stained using the PageBlue Protein Saining Solution (Fermentas).

104  
 105  
 106  
 107  
 108  
 109  
 110  
 111  
 112  
 113  
 114  
 115  
 116

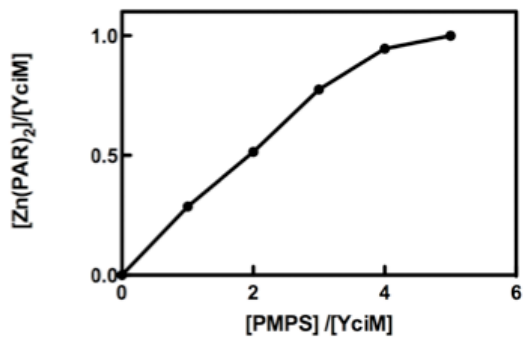

117

118 **Figure S3. YciM binds zinc via 4 cysteine residues.** The purified YciM<sub>His</sub><sup>\*</sup> protein was  
119 incubated with PAR and A<sub>500</sub> was monitored to follow the formation of the Zn(PAR)<sub>2</sub> complex.  
120 Stepwise additions of stoichiometric amount of PMPS induced zinc release. The [PMPS]/[YciM]  
121 ratio corresponds to the number of cysteine residues that have to be titrated to allow zinc release.  
122 The concentration of the Zn(PAR)<sub>2</sub> complex ([Zn(PAR)<sub>2</sub>]) corresponds to the concentration of  
123 zinc released from YciM.

124

125

126

127

128

129

130

131

132

133

134

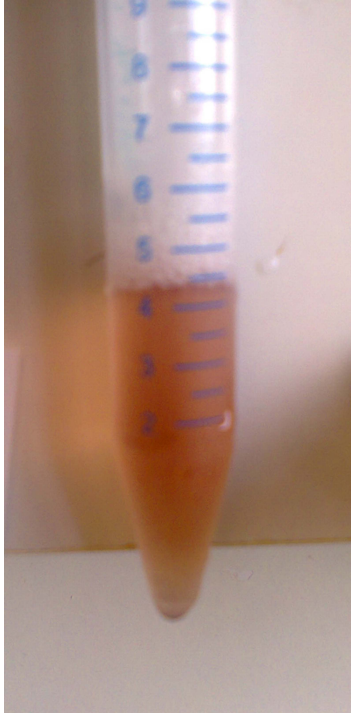

135

136 **Figure S4. Aerobically-purified YciM\*<sub>Strep</sub> displays a pink color.** YciM\*<sub>Strep</sub> was purified by  
137 affinity chromatography using a Strep-Tactin column, followed by an anion exchange  
138 chromatography and a gel filtration. The fractions that eluted from the gel filtration column were  
139 pooled and concentrated. The purified protein displays a bright pink color owing to its ability to  
140 bind iron.

141

142

143

144

145

146

147

148

149 **REFERENCES**

150

151 **1. Casadaban MJ, Cohen SN.** 1980. Analysis of gene control signals by DNA fusion and  
152 cloning in Escherichia coli. *Journal of molecular biology* **138**:179-207.

153 **2. Studier FW, Moffatt BA.** 1986. Use of bacteriophage T7 RNA polymerase to direct  
154 selective high-level expression of cloned genes. *Journal of molecular biology* **189**:113-  
155 130.

156 **3. Datsenko KA, Wanner BL.** 2000. One-step inactivation of chromosomal genes in  
157 Escherichia coli K-12 using PCR products. *Proc Natl Acad Sci U S A* **97**:6640-6645.

158 **4. Baba T, Ara T, Hasegawa M, Takai Y, Okumura Y, Baba M, Datsenko KA, Tomita**  
159 **M, Wanner BL, Mori H.** 2006. Construction of Escherichia coli K-12 in-frame, single-  
160 gene knockout mutants: the Keio collection. *Mol Syst Biol* **2**:2006 0008.

161

162
